# Supplementary material for: Single-molecular phosphorus phthalocyanine-based near-infrared-II nanoagent for photothermal antitumor therapy
Source: Royal Society of Chemistry journal article supplement (doi:10.1039/d0ra03530k), 2020-01-01
Supplement: d0ra03530k1.pdf [file d0ra03530k1.pdf]

Supporting Information for

## Single-molecular phosphorus phthalocyanine-based near-infrared-II nanoagent for photothermal antitumor therapy

Li-Na Zhou,<sup>a</sup> Houhe Pan,<sup>b</sup> Jing-Lan Kan,<sup>\*a</sup> Qun Guan,<sup>a</sup> Yang Zhou,<sup>a</sup> and Yu-Bin Dong<sup>\*a</sup>

<sup>a</sup>College of Chemistry, Chemical Engineering and Materials Science, Collaborative Innovation Centre of Functionalized Probes for Chemical Imaging in Universities of Shandong, Key Laboratory of Molecular and Nano Probes, Ministry of Education, Shandong Normal University, Jinan 250014, P. R. China.

<sup>b</sup> Beijing National Laboratory for Molecular Sciences (BNLMS), CAS Research/Education Center for Excellence in Molecular Sciences, Institute of chemistry, Chinese Academy of Sciences, Beijing 100190, P. R. China.

\*Correspondence: kanjinglan@163.com, yubindong@sdu.edu.cn

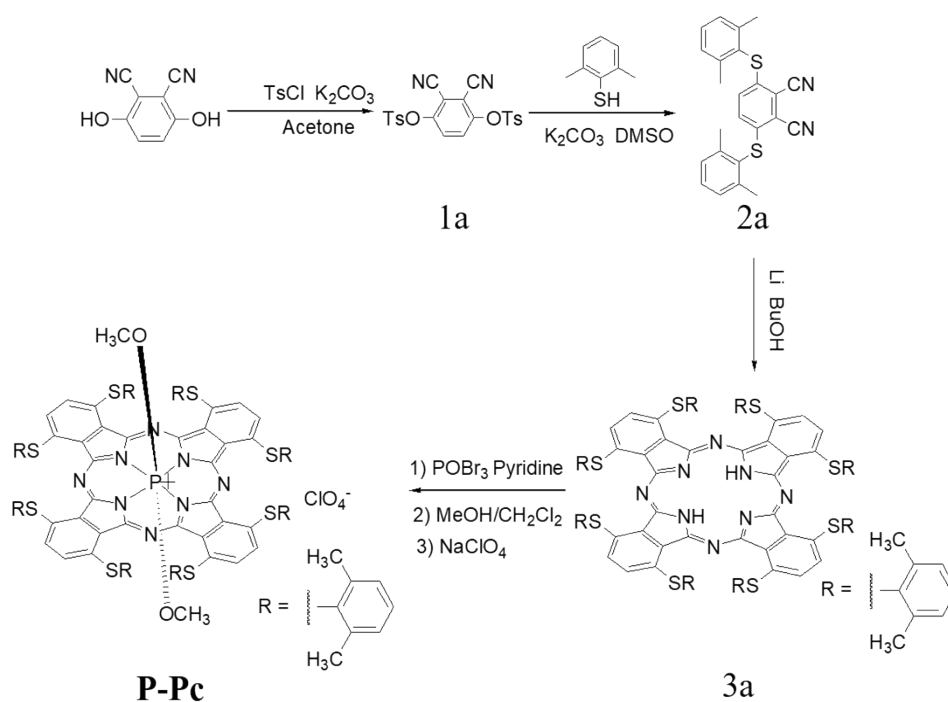

**Fig. S1.** Synthesis of P-Pc.

**3,6-Bis(4'-methylphenylsulfonyloxy)phthalonitrile (1a):** *p*-Toluenesulfonyl chloride (5.20 g, 27 mmol) was added to a mixture of 2,3-dicyanohydroquinone (2.00 g, 12.49 mmol) and potassium carbonate (6.90 g, 50 mmol) in acetone (15 mL). The mixture was heated to reflux for 2 h. Thin layer chromatography (TLC) was performed to determine the consumption of compound 2,3-dicyanohydroquinone. The mixture was cooled to room temperature, poured into water (40 mL)

and stirred for 1 h. The light brown product was filtered and oven dried. Yield: 5.29 g (90.4%). IR [ $\nu_{\max}/\text{cm}^{-1}$ ]: 3432, 3239, 3085, 2243, 2226 (CN), 1504, 1449, 1315, 1279, 1204, 1174, 1142, 1021, 1004, 979, 934, 847, 749, 694, 638, 614.

**3,6-Bis(phenylthio)phthalonitrile (2a):** **1a** (2.34 g, 5 mmol) and potassium carbonate (2.80 g, 20 mmol) were added to a solution of 2,6-dimethylthiophenol (4.40 mg, 30 mmol) in DMSO. After stirred for 14 h at room temperature, the reaction was quenched with water. The mixture was extracted with  $\text{CHCl}_3$  and washed with 5%  $\text{NaCO}_3$  solution and water. The organic layer was dried over  $\text{MgSO}_4$  and concentrated in vacuo. The product was purified by silica gel column chromatography ( $\text{CHCl}_3$ ) followed by recrystallization with MeOH. Title compound was obtained (200 mg, 10%) as a pale yellow powder.  $^1\text{H-NMR}$  (400 MHz,  $\text{CDCl}_3$ )  $\delta$  (ppm): 7.25 (d, 2H), 7.17 (d, 4H), 6.40 (s, 2H), 2.36 (s, 12H).

**$\alpha$ -(2,6-Dimethylphenylthio) $_8\text{PcH}_2$  (3a):** **2a** (103 mg, 0.3 mmol) was added to a solution of lithium (14 mg, 2.0 mmol) in 1 mL of *n*-butanol and heated under reflux for 2 h. The mixture was purified by alumina gel column chromatography ( $\text{CHCl}_3$ ). The title compound was obtained (63.8 mg, 62%) as a dark red powder. MALDI-TOF mass calculated for  $\text{C}_{96}\text{H}_{82}\text{N}_8\text{S}_8$  [ $\text{M}^+$ ]: 1602.442; found: 1602.035.

**$[\alpha$ -(2,6-Dimethylphenylthio) $_8\text{PcP}(\text{OMe})_2]^+[\text{ClO}_4]^-$  (P-Pc):** Phosphorus oxybromide (1.5 g) was added a solution of **3a** (133 mg, 83  $\mu\text{mol}$ ) in 2 mL of pyridine and stirred for 30 min at room temperature. After the solvent was removed in vacuo, the residue was dissolved in a solution of dichloromethane/methanol (50/50, v/v) and stirred for 30 min at room temperature. The organic layer was collected, washed with water, and solvent was removed to yield a dark green product (phosphorus Pc). The resulting solid was dissolved in dichloromethane, then  $\text{NaClO}_4$  (41.5 mg, 340  $\mu\text{mol}$ ) was added. After the mixture was stirred for 12 h at room temperature, solvent was removed, and the residue was recrystallized from dichloromethane/*n*-hexane. **P-Pc** was obtained (105 mg, 75%) as a dark green powder. The UV-vis-NIR spectrum of P-Pc in chloroform solution shown in Fig. S2.  $^1\text{H-NMR}$  (400 MHz,  $\text{CDCl}_3$ )  $\delta$  (ppm): 7.36-7.33 (m, 8H), 7.29-7.28 (m, 16H), 6.87 (s, 8H), 2.52 (s, 48H), 0.36 (d, 6H).  $^{13}\text{C-NMR}$  ( $\text{CDCl}_3$ )  $\delta$  (ppm): 145.25, 144.33, 137.69, 130.52, 129.20, 128.52, 127.75, 21.86.  $^{31}\text{P-NMR}$  ( $\text{CDCl}_3$ )  $\delta$  (ppm): -180. MALDI-TOF mass calculate for  $\text{C}_{98}\text{H}_{86}\text{N}_8\text{O}_2\text{PS}_8$  [ $\text{M}-\text{ClO}_4$ ] $^+$ : 1693.437; found: 1693.281.

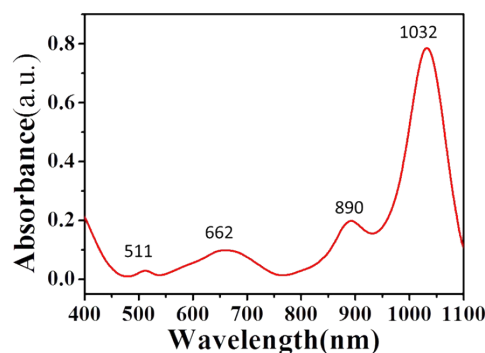

**Fig. S2** UV-vis-NIR spectrum of **P-Pc** in chloroform.

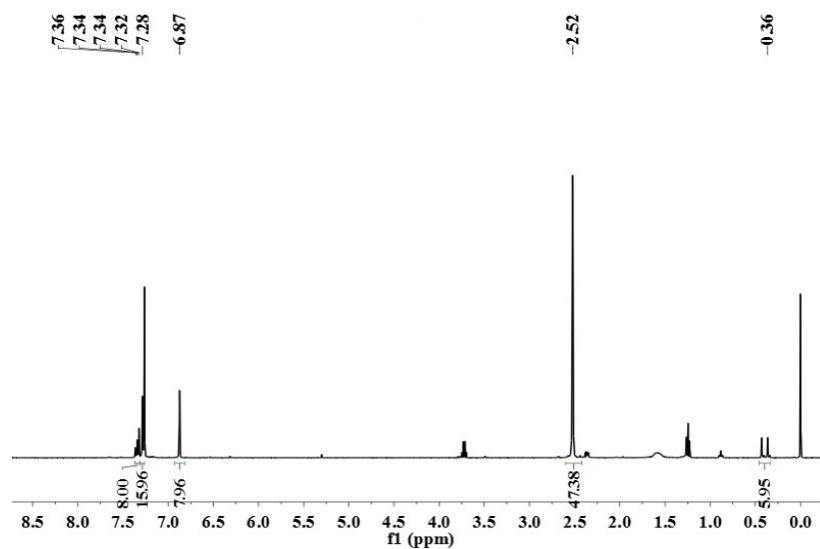

**Fig. S3**  $^1\text{H}$  NMR spectrum of **P-Pc** in  $\text{CDCl}_3$ . The signals at 7.26, 5.30, and 1.50 ppm due to residual  $\text{CHCl}_3$ ,  $\text{CH}_2\text{Cl}_2$ , and  $\text{H}_2\text{O}$ , respectively.

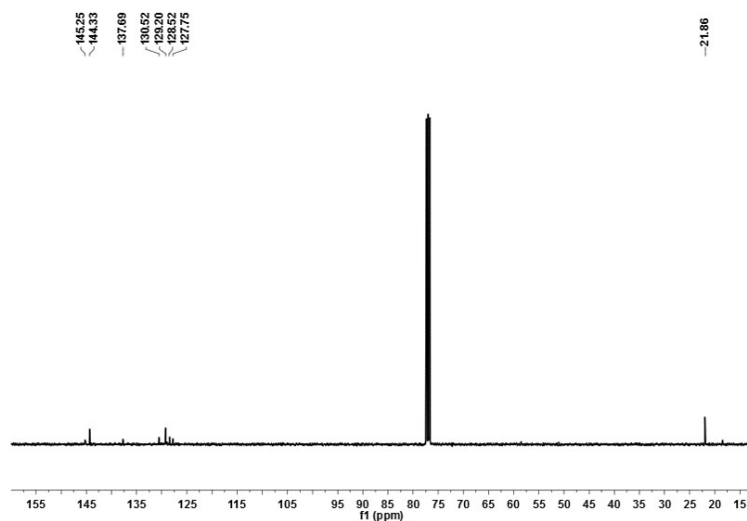

**Fig. S4**  $^{13}\text{C}$  NMR spectrum of **P-Pc** in  $\text{CDCl}_3$ .

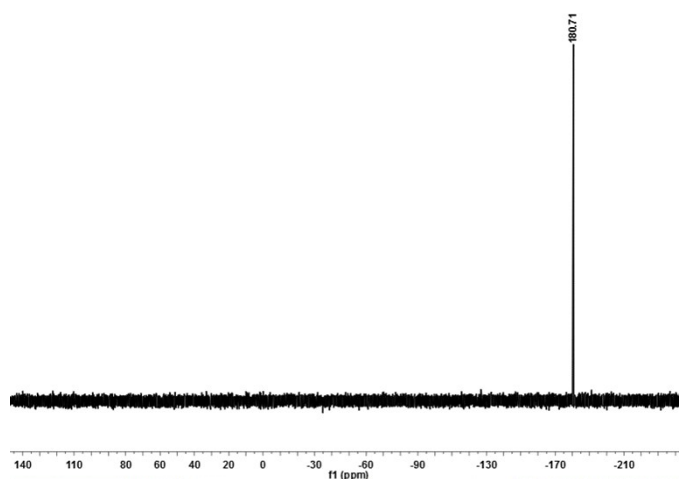

**Fig. S5**  $^{31}\text{P}$  NMR spectrum of **P-Pc** in  $\text{CDCl}_3$ .

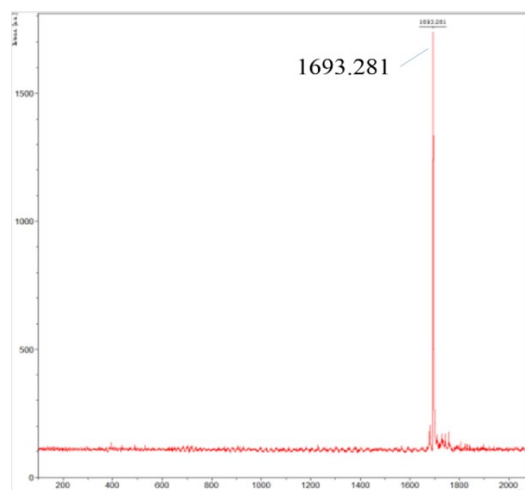

**Fig. S6** MALDI-TOF mass spectrum for **P-Pc**.

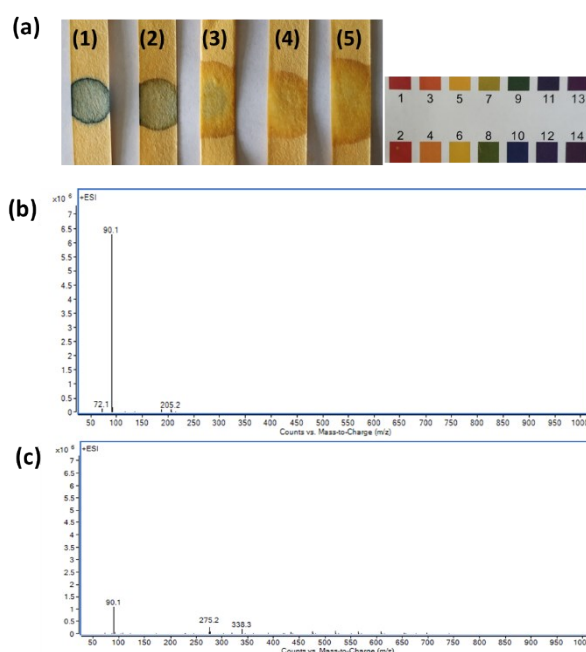

**Fig. S7** (a) pH paper test for the mixed solution of DMEA:THF:H<sub>2</sub>O (v/v/v = 1:1:20) (1) and the dialysate for the first (2), second (3), fifth (4), seven (5) times. The alkalinity of dialysate became weaker until neutral, indicating the free small organic molecules can be removed by dialysis. (b) The mass spectrum for **P-Pc-HSA** NPs solution (50  $\mu$ L, 1 mL methanol) before dialysis (MS: m/z calcd for [DMEA]<sup>+</sup> 90.1, [THF] 72.1). (c) The mass spectrum for **P-Pc-HSA** NPs solution (50  $\mu$ L, 1 mL methanol) after dialysis. As shown in Fig. S7c, the content of organic molecules in **P-Pc-HSA** NPs solution was extremely low after dialysis.

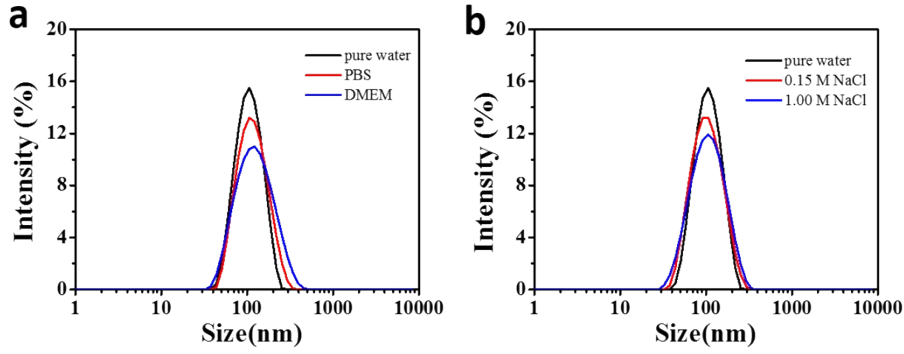

**Fig. S8** Size distribution of **P-Pc-HSA** NPs in (a) water, PBS, DMEM and (b) NaCl measured by DLS.

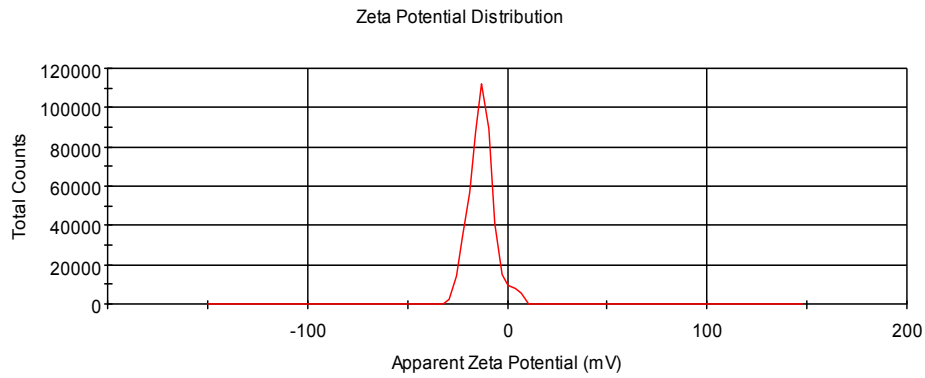

**Fig. S9**  $\zeta$  potential of **P-Pc-HSA** NPs in aqueous solution.

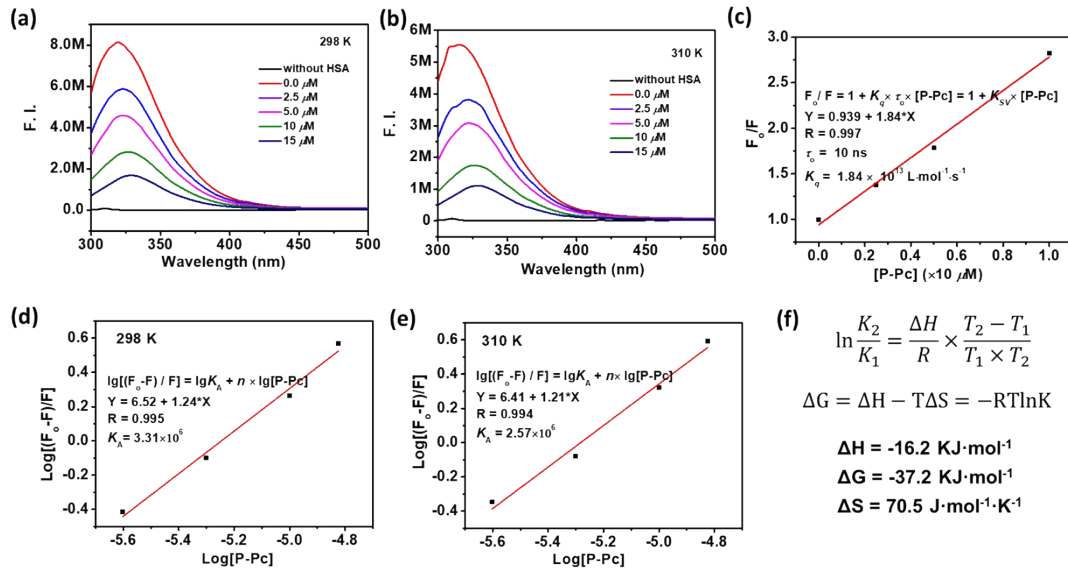

**Fig. S10** Fluorescence spectra ( $\lambda_{\text{ex}} = 280 \text{ nm}$ ) of HSA ( $\text{H}_2\text{O}$ ,  $10 \mu\text{M}$ ) at 298 K (a) and 310 K (b) quenching caused by P-Pc (DMEA/THF,  $v/v = 1:1$ ,  $100 \mu\text{L}$ ). (c) The Stern-Volmer plot of HSA with P-Pc at 298 K.  $F_0/F$  and  $[\text{P-Pc}]$  showed good linearity relationship and the Stern–Volmer quenching constant  $K_{SV}$  was  $1.84 \times 10^5 \text{ L}\cdot\text{mol}^{-1}$  and the corresponding quenching rate constant  $K_q$

was  $1.84 \times 10^{13} \text{ L} \cdot \text{mol}^{-1} \cdot \text{s}^{-1}$  ( $\tau_o = 10 \text{ ns}$ ), which is much higher than the limiting diffusion constant of the biomolecules ( $2.0 \times 10^{10} \text{ L} \cdot \text{mol}^{-1} \cdot \text{s}^{-1}$ ), confirming close interaction between HSA and P-Pc. Double logarithmic regression curves of HSA with P-Pc at 298 K (d) and 310 K (e). The binding constants ( $K_A$ ) are higher than  $10^6$  and the binding stoichiometry between HSA and P-Pc is 1:1. (f) Calculation details of thermodynamic parameters of  $\Delta H$  and  $\Delta S$ . The thermodynamic parameters  $\Delta H < 0$  and  $\Delta S > 0$ , indicating HSA interacted with P-Pc mainly by electrostatic effect.<sup>1-3</sup>

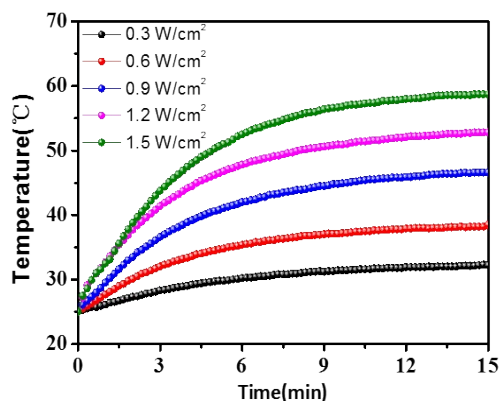

**Fig. S11** Temperature increase curves of P-Pc-HSA NPs (72  $\mu\text{g/mL}$ ) exposure to the 1064 nm laser at different power density.

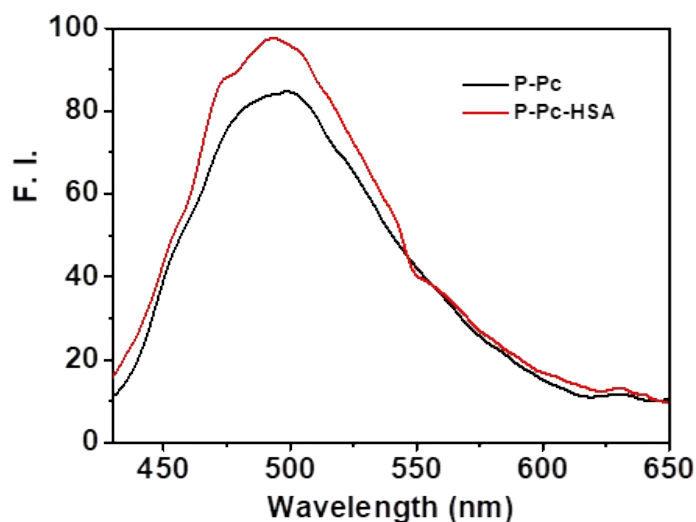

**Fig. S12** Fluorescence spectra of P-Pc and P-Pc-HSA NPs (both at 2.5  $\mu\text{M}$ , P-Pc equiv) in water upon irradiation at 405 nm.

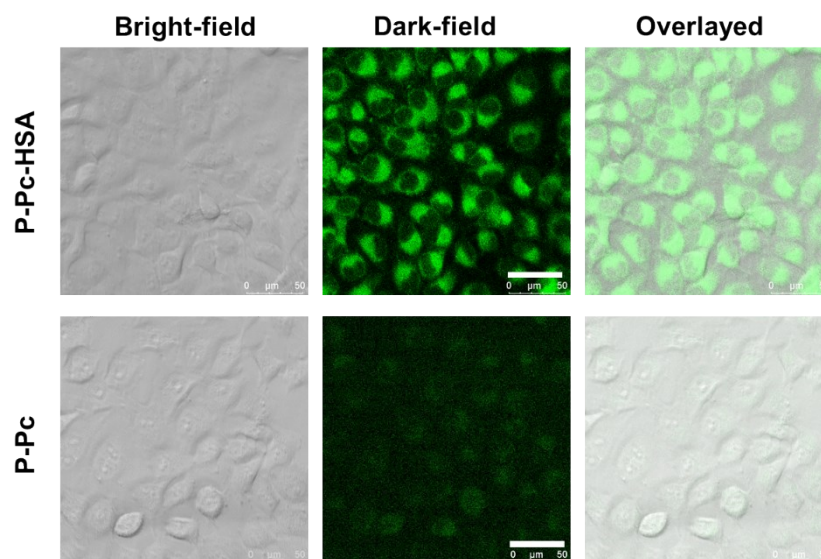

**Fig. S13.** *In vitro* CLSM images of MCF-7 cells treated with P-Pc and **P-Pc-HSA** NPs (both at 144  $\mu\text{g}/\text{mL}$ , P-Pc equiv) for 2 h, using a green channel for phthalocyanine ( $\lambda_{\text{ex}} = 405 \text{ nm}$ , 430-560 nm), scale bar 50  $\mu\text{m}$ .

### Reference

1. J. R. Lakowicz and G. Weber, *Biochemistry*, 1973, **12**, 4171-4179
2. P. D. Ross and S. Subramanian, *Biochemistry*, 1981, **20**, 3096-3102
3. X. Li, S. Yu, Y. Lee, T. Guo, N. Kwon, D. Lee, S. C. Yeom, Y. Cho, G. Kim, J. D. Huang, S. Choi, K. T. Nam and J. Yoon, *J. Am. Chem. Soc.*, 2019, **141**, 1366-1372.
